# Supplementary material
Source: PubMed Central journal article supplement (PMC4048303)
Supplement: chan-8-142-s01.pdf [file chan-8-142-s01.pdf]

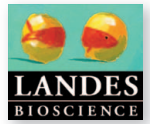

## **Supplemental Material to:**

**Kenji F Shoji, Pablo J Sáez, Paloma Harcha, Hector L Aguila,  
and Juan C Sáez**

**Pannexin1 channels act downstream of P2X7 receptors in  
ATP-induced murine T-cell death**

**March/April 2014; Vol 8 (2)**

**<http://dx.doi.org/10.4161/chan.28122>**

**<http://www.landesbioscience.com/journals/channels/article/28122>**

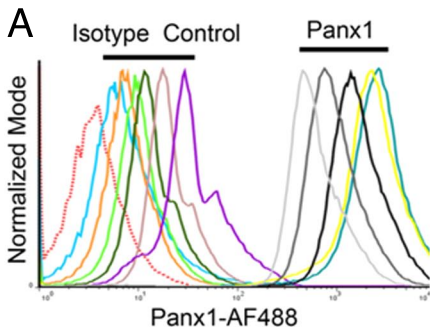

anti-Panx1    Isoty Ctrl.

— 1:800      — 1:800

— 1:400      — 1:400

— 1:200      — 1:200

— 1:100      — 1:100

— 1: 50      — 1: 50

— Only second antibody

— Unstained

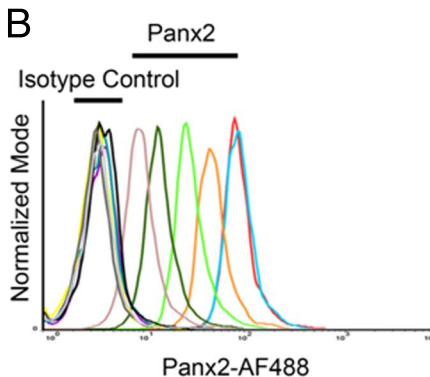

Isoty Ctrl.      anti-Panx2

— 1:1600      — 1:1600

— 1: 800      — 1: 800

— 1: 400      — 1: 400

— 1: 200      — 1: 200

— 1: 100      — 1: 100

— 1: 50      — 1: 50

CD4

CD8

A

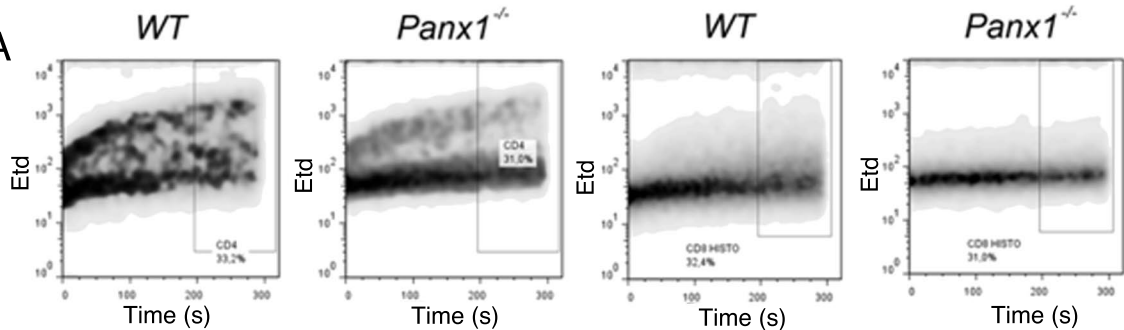

B

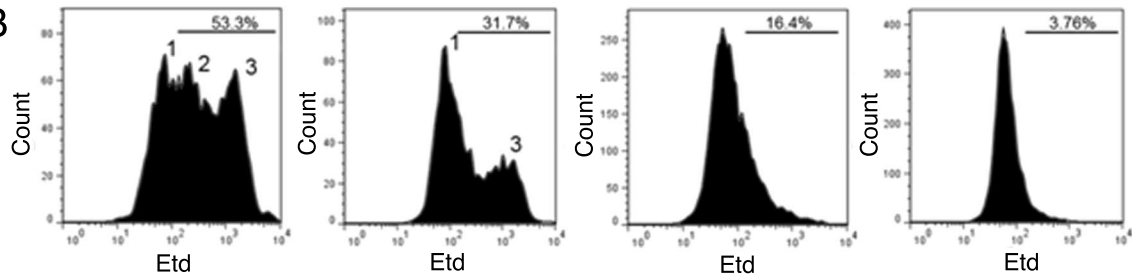

**A**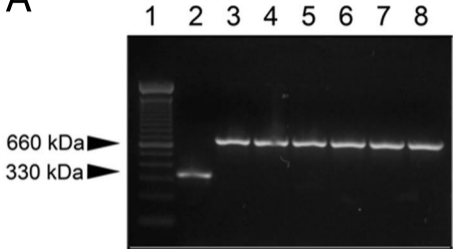**B**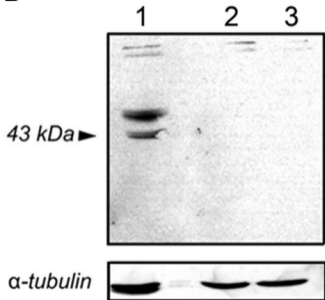

**Figure S1.** Titration of Panx1 and Panx2 antibodies. Representative histogram plots showing the titration curves done for rabbit anti-Panx1 **(A)** and anti-Panx2 **(B)** antibodies. Isotype IgGs were used as non-specific controls. On the right side, the different treatments applied are listed and denoted by the corresponding line color.

**Figure S2.** Different pathways of dye uptake in CD4 T cells. T cells derived from WT or Panx1<sup>-/-</sup> mice were labeled with anti-CD4 conjugated to AF488 and anti-CD8 conjugated to APC and incubated with 1 mM ATP. Cells were monitored in real time with flow cytometry and displayed as densitometric analysis **(A)** or as histogram **(B)**. Real time flow cytometric experiments were done, and representative densitometric curves showing the Etd uptake in CD4<sup>+</sup> or CD8<sup>+</sup> gated cells were taken. **(A)** Representative Etd kinetics between WT or Panx1<sup>-/-</sup> cells are shown. **(B)** Etd uptake histogram showing the frequency of dye uptake by responding cells from WT or Panx1<sup>-/-</sup> mice, in either CD4<sup>+</sup> or CD8<sup>+</sup> T cells.

**Figure S3.** Targeted disruption in mouse Panx1<sup>-/-</sup> gene. Evidence for complete Panx1 deletion was obtained by RT-PCR analysis from tail DNA from 8-week-old mice and western blot analyses using total PLNs. **(A)** PCR experiments yielded a 330-bp for wild type mouse (line **1**) and 660-bp for C57B6 / Panx1<sup>-/-</sup>(lines **2-8**). **(B)** Representative immunoblot showing Panx1 in mouse PLNs from wild type (line **1**) and Panx1<sup>-/-</sup> mice (lines **2,3**)(100 µg of total protein/lane). In wild type, immunoreactive bands are likely to correspond to the non-glycosylated (43 kDa) and glycosylated forms (60 kDa) of Panx1. At the bottom, immune blot showing α-tubulin used as protein loading controls.
